# Supplementary material for: Hyperhalogen properties of early-transition-metal borates
Source: Royal Society of Chemistry journal article supplement (doi:10.1039/c7ra10238k), 2017-01-01
Supplement: c7ra10238k1.pdf [file c7ra10238k1.pdf]

**Electronic Supplementary Information (ESI)**

**Hyperhalogen Properties of Early-Transition-Metal Borates**

Jia-Yuan Liu <sup>a</sup>, Hai-Di Ma <sup>a</sup>, Yan-Bo Sun <sup>a</sup>, Ying Li <sup>a</sup>, Wei-Ming Sun<sup>b</sup>, Di Wu <sup>\*a</sup>, Zhi-Ru Li <sup>a</sup>

*<sup>a</sup>Institute of Theoretical Chemistry, Laboratory of Theoretical and Computational Chemistry, Jilin University, Changchun 130023, China*

*<sup>b</sup>Department of Basic Chemistry, The School of Pharmacy, Fujian Medical University, Fuzhou 350108, China*

---

\*Corresponding author.  
Email address: wud@jlu.edu.cn

Table S1. The VDE values (in eV) of  $\text{Al}(\text{BO}_2)_n^-$ <sup>[a]</sup>,  $\text{Sc}(\text{BO}_2)_n^-$ <sup>[b]</sup>,  $\text{Sc}(\text{BH}_4)_n^-$ <sup>[c]</sup>,  $\text{ScF}_n^-$ <sup>[d]</sup>,  $\text{Ti}(\text{BO}_2)_n^-$ <sup>[b]</sup>,  $\text{TiF}_n^-$ <sup>[d]</sup>,  $\text{V}(\text{BO}_2)_n^-$ <sup>[b]</sup> and  $\text{VF}_n^-$ <sup>[d]</sup>

| $n$ | $\text{Al}(\text{BO}_2)_n^-$ | $\text{Sc}(\text{BO}_2)_n^-$ | $\text{Sc}(\text{BH}_4)_n^-$ | $\text{ScF}_n^-$ | $\text{Ti}(\text{BO}_2)_n^-$ | $\text{TiF}_n^-$ | $\text{V}(\text{BO}_2)_n^-$ | $\text{VF}_n^-$ |
|-----|------------------------------|------------------------------|------------------------------|------------------|------------------------------|------------------|-----------------------------|-----------------|
| 1   | 0.39                         | 1.41                         | 1.41                         | 1.05             | 1.76                         | 1.01             | 3.03                        | 1.01            |
| 2   | 3.46                         | 1.94                         | 1.25                         | 1.22             | 1.65                         | 1.18             | 2.11                        | 1.03            |
| 3   | 3.94                         | 2.59                         | 2.14                         | 1.49             | 3.71                         | 1.72             | 5.10                        | 2.62            |
| 4   | 8.28                         | 8.69                         | 6.47                         | 7.74             | 4.86                         | 2.32             | 8.72                        | 4.22            |
| 5   |                              |                              |                              |                  | 9.30                         | 7.89             | 9.27                        | 5.06            |
| 6   |                              |                              |                              |                  |                              |                  | 8.23                        | 8.29            |

<sup>[a]</sup> VDE values from reference [33].

<sup>[b]</sup> VDE values of the lowest-energy configurations of  $\text{TM}(\text{BO}_2)_n^-$  (TM = Sc, Ti, V)

<sup>[c]</sup> VDE values from reference [52]

<sup>[d]</sup> VDE values from reference [50]

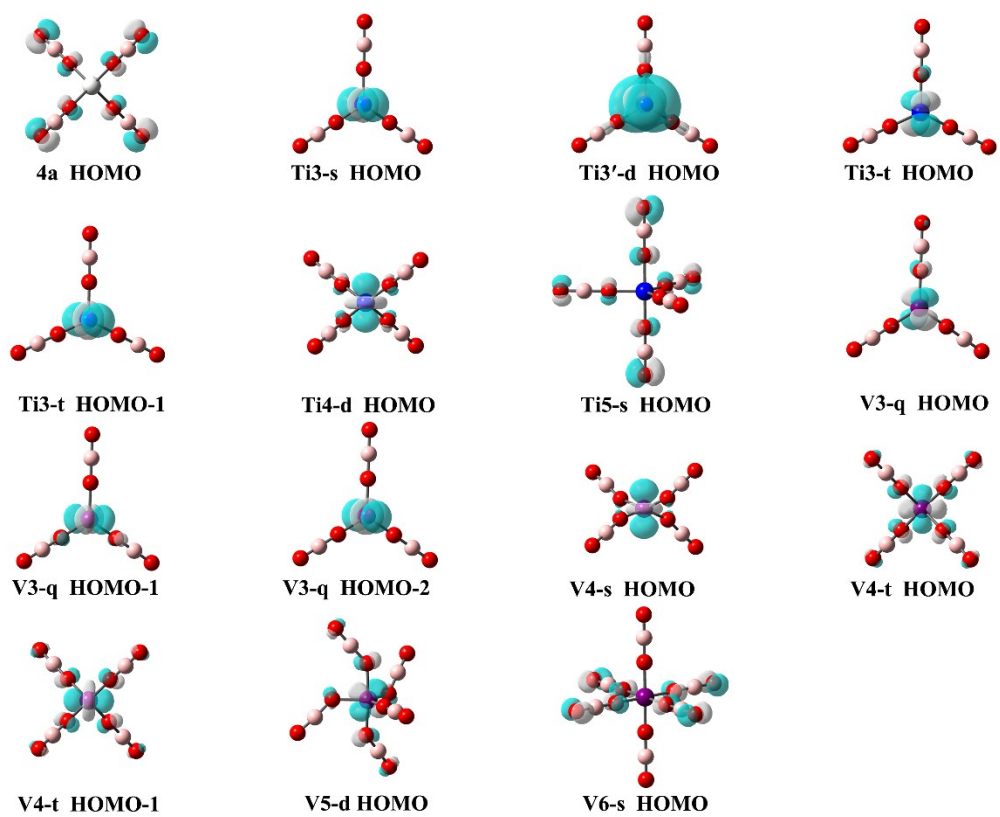

**Figure S1.** Critical MOs of 4a, Ti3-s, Ti3'-d, Ti3-t, Ti4-d, Ti5-s, V3-q, V4-s, V4-t, V5-d, and V6-s. (Color legend: Sc, grey; Ti, blue; V, purple; O, red; B, light pink.)
